# Supplementary material
Source: Springer Nature journal article supplement (https://www.springermedizin.de/resource/supplementary/12889_2013_6163_MOESM2_ESM.pdf/9496824)
Supplement: MOESM2 [file 9496824]

**a****Males**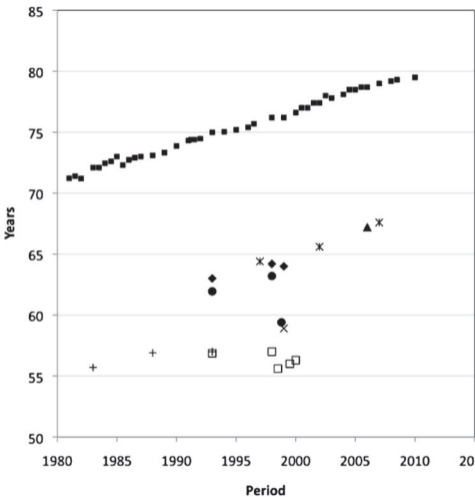

■ All Australia [3]

+ Aboriginals (Preston-Hill with Luther &amp; Retherford) [40]

□ Aboriginals (Preston-Hill) [15,24,29]

× Aboriginals (Hill) [45]

● Aboriginals (Bhat) [22]

◆ Aboriginals (General Growth Balance) [44]

▲ Aboriginals (CDE-adjusted) [47]\*

\* Redfern AMS cohort (Sydney) [53]

**b****Females**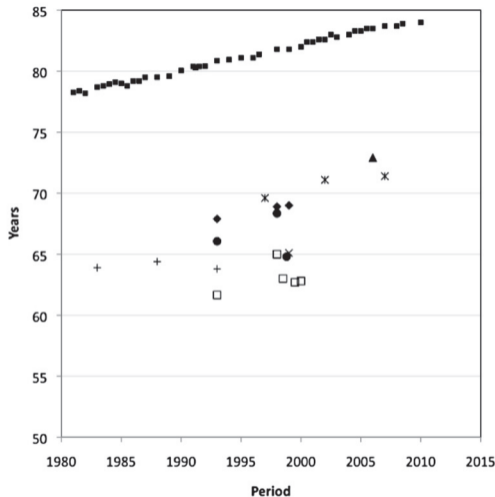

\*CDE likely to over-estimate Aboriginal life expectancy
